# Supplementary material
Source: Research Square preprint supplement (doi:10.21203/rs.3.rs-9269281/v1)
Supplement: Supplementary file 1 [file 4cb8b9fb9d2eb0af32f9939c.docx]

|  | Before PSM | | | | After PSM | | |
| --- | --- | --- | --- | --- | --- | --- | --- |
| Variable | **Non-Smokers (n=7779)** | **Smokers (n=3597)** | **P-Value** | | **Non-Smokers (n=3219)** | **Smokers (n=3219)** | **P-Value** |
| Demographics |  |  |  |  | |  |  |
| Age at index (mean ± SD) | 51.8 ± 16.2 | 55.7 ± 14.9 | **<0.0001** | | 55.5 ± 15.2 | 55.1 ± 15.1 | 0.2285 |
| Female | 4328 (55.62) | 1422 (39.55) | **<0.0001** | | 1366 (42.44) | 1385 (43.03) | 0.6322 |
| Hispanic | 1028 (13.21) | 326 (9.06) | **<0.0001** | | 319 (9.91) | 310 (9.63) | 0.7056 |
| White | 4774 (61.37) | 2411 (67.06) | **<0.0001** | | 2121 (65.89) | 2145 (66.64) | 0.527 |
| Black/African American | 1308 (16.82) | 684 (19.02) | **0.0041** | | 612 (19.01) | 594 (18.45) | 0.5653 |
| Asian | 417 (5.36) | 97 (2.70) | **<0.0001** | | 95 (2.95) | 97 (3.01) | 0.8835 |
| Unknown race | 838 (10.77) | 226 (6.29) | **<0.0001** | | 215 (6.68) | 217 (6.74) | 0.9206 |
| Other race | 393 (5.05) | 149 (4.14) | **0.0342** | | 154 (4.78) | 140 (4.35) | 0.4033 |
| BMI (kg/m²) (Mean ± SD) | 31.4 ± 7.62 | 31.7 ± 7.32 | 0.0718 | | 31.7 ± 7.37 | 31.8 ± 7.34 | 0.8546 |
| Comorbidities |  |  |  | |  |  |  |
| Hypertensive diseases | 3669 (47.17) | 2111 (58.72) | **<0.0001** | | 1838 (57.10) | 1823 (56.63) | 0.7058 |
| Ischemic heart disease | 468 (6.02) | 386 (10.73) | **<0.0001** | | 304 (9.44) | 305 (9.48) | 0.966 |
| Atrial fibrillation and flutter | 277 (3.56) | 161 (4.48) | **0.0183** | | 154 (4.78) | 140 (4.35) | 0.4033 |
| Diabetes mellitus | 1662 (21.37) | 913 (25.39) | **<0.0001** | | 812 (25.23) | 810 (25.16) | 0.9542 |
| Obesity/hyperalimentation | 2184 (28.08) | 1150 (31.97) | **<0.0001** | | 1017 (31.59) | 1007 (31.28) | 0.7884 |
| Personal history of malignant neoplasm | 370 (4.76) | 299 (8.32) | **<0.0001** | | 250 (7.77) | 243 (7.55) | 0.7429 |
| Pituitary/Endocrine-Related Diagnoses |  |  |  | |  |  |  |
| Diabetes insipidus | 1249 (16.06) | 599 (16.65) | 0.4224 | | 520 (16.15) | 515 (16.00) | 0.8653 |
| Hypopituitarism | 1396 (17.94) | 805 (22.38) | **<0.0001** | | 681 (21.16) | 682 (21.19) | 0.976 |
| Hyperprolactinemia | 510 (6.56) | 195 (5.42) | **0.0196** | | 166 (5.16) | 179 (5.56) | 0.472 |
| Acromegaly and pituitary gigantism | 623 (8.01) | 280 (7.79) | 0.6805 | | 261 (8.11) | 258 (8.02) | 0.891 |
| Cushing’s syndrome | 851 (10.94) | 315 (8.76) | **0.0004** | | 305 (9.48) | 295 (9.16) | 0.668 |
| Pituitary-dependent Cushing’s | 733 (9.42) | 262 (7.28) | **0.0002** | | 249 (7.74) | 247 (7.67) | 0.926 |
| Other hyperfunctions of the pituitary gland | 219 (2.82) | 69 (1.92) | **0.0046** | | 71 (2.21) | 66 (2.05) | 0.666 |
| Pituitary disorder, unspecified | 1794 (23.06) | 842 (23.41) | 0.684 | | 772 (23.98) | 748 (23.24) | 0.481 |
| Other pituitary disorders | 2899 (37.27) | 1422 (39.56) | **0.0206** | | 1257 (39.05) | 1255 (38.99) | 0.959 |
| Testicular dysfunction | 418 (5.37) | 312 (8.68) | **<0.0001** | | 246 (7.64) | 247 (7.67) | 0.963 |
| Polycystic ovarian syndrome | 121 (1.56) | 32 (0.89) | **0.0041** | | 29 (0.90) | 32 (0.99) | 0.7 |
| Hypothyroidism | 2081 (26.76) | 1128 (31.37) | **<0.0001** | | 988 (30.69) | 976 (30.32) | 0.7453 |
| Related Symptoms |  |  |  | |  |  |  |
| Headache | 1204 (15.48) | 625 (17.38) | **0.0104** | | 540 (16.78) | 548 (17.02) | 0.79 |
| Malaise/fatigue | 232 (2.98) | 172 (4.78) | **<0.0001** | | 143 (4.44) | 151 (4.69) | 0.633 |
| Visual disturbance | 2064 (26.54) | 1081 (30.06) | **<0.0001** | | 937 (29.11) | 938 (29.14) | 0.978 |
| Blindness/low vision | 1019 (13.10) | 594 (16.52) | **<0.0001** | | 490 (15.22) | 496 (15.41) | 0.836 |
| Mental, behavioral, and neurodevelopmental disorders | 1736 (22.32) | 1729 (48.06) | **<0.0001** | | 1341 (41.66) | 1357 (42.16) | 0.686 |
| Adrenocortical insufficiency symptoms | 1225 (15.75) | 713 (19.83) | **<0.0001** | | 595 (18.48) | 601 (18.67) | 0.848 |
| Medications |  |  |  | |  |  |  |
| Long-term (current) steroid use | 255 (3.28) | 213 (5.93) | **<0.0001** | | 155 (4.82) | 157 (4.88) | 0.908 |
| Long-term (current) anticoagulant use | 203 (2.61) | 170 (4.73) | **<0.0001** | | 129 (4.01) | 132 (4.10) | 0.85 |
| Thyroid supplements | 1446 (18.58) | 773 (21.50) | **0.0003** | | 660 (20.50) | 677 (21.03) | 0.602 |
| Blood glucose regulation agents | 3557 (45.71) | 1841 (51.21) | **<0.0001** | | 1628 (50.58) | 1620 (50.33) | 0.842 |
| Insulin | 2536 (32.60) | 1332 (37.04) | **<0.0001** | | 1177 (36.56) | 1168 (36.29) | 0.816 |
| Antihyperglycemics | 2445 (31.44) | 1312 (36.49) | **<0.0001** | | 1154 (35.85) | 1146 (35.60) | 0.835 |
| Glucocorticoids | 5730 (73.67) | 2782 (77.34) | **<0.0001** | | 2467 (76.64) | 2472 (76.79) | 0.883 |
| Estrogens/progestins | 184 (2.36) | 42 (1.17) | **0.0002** | | 44 (1.37) | 42 (1.30) | 0.952 |
| Dopamine agonists (Cabergoline/Bromocriptine) | 250 (3.21) | 89 (2.47) | 0.067 | | 80 (2.48) | 79 (2.45) | 0.95 |
| Other pituitary hormones | 659 (8.47) | 389 (10.81) | **<0.0001** | | 334 (10.38) | 326 (10.13) | 0.978 |
| Labs |  |  |  | |  |  |  |
| Sodium (mmol/L) (mean ± SD) | 138 ± 3.39 | 139 ± 3.52 | **<0.0001** | | 138 ± 3.48 | 138 ± 3.49 | 0.159 |
| Glucose (mg/dL) (mean ± SD) | 122 ± 34.1 | 122 ± 34.2 | 0.3878 | | 122 ± 33.9 | 121 ± 34.2 | 0.123 |
| Hemoglobin (g/dL) (mean ± SD) | 12.6 ± 2.04 | 12.6 ± 2.46 | 0.5778 | | 12.6 ± 2.15 | 12.6 ± 2.44 | 0.952 |

**Table 1. Baseline Demographic and Clinical Characteristics of Patients Undergoing Endoscopic Transsphenoidal Resection of Benign Pituitary Tumors Before and After Propensity Score Matching.**
