# Supplementary material
Source: Research Square preprint supplement (doi:10.21203/rs.3.rs-9269281/v1)
Supplement: Supplementary file 2 [file 73771928f35892a27f1113c7.docx]

|  | Before PSM | | | | After PSM | | | |
| --- | --- | --- | --- | --- | --- | --- | --- | --- |
| Outcome n (%) | **Non-Smokers (n=7779)** | **Smokers (n=3597)** | **OR (95% CI)** | **P-Value** | **Non-Smokers (n=3219)** | **Smokers (n=3219)** | **OR (95% CI)** | **P-Value** |
| Short-Term Surgical Outcomes |  |  |  |  |  |  |  |  |
| Postoperative cerebrospinal fluid leak | 516 (6.63) | 313 (8.70) | **1.34 (1.16-1.55)** | **0.0001** | 216 (6.71) | 276 (8.57) | **1.30 (1.08-1.57)** | **0.0056** |
| Intraoperative arterial injury | 372 (4.78) | 207 (5.75) | **1.22 (1.02-1.45)** | **0.031** | 179 (5.56) | 179 (5.56) | 1.00 (0.81-1.24) | 1 |
| Infection (including meningitis) | 134 (1.72) | 59 (1.64) | 0.95 (0.70-1.30) | 0.8149 | 53 (1.65) | 48 (1.49) | 0.90 (0.61-1.34) | 0.6885 |
| Other Short-Term Outcomes |  |  |  |  |  |  |  |  |
| Reoperation (within 30 days) | 186 (2.39) | 100 (2.78) | 1.17 (0.91-1.49) | 0.2214 | 75 (2.33) | 84 (2.61) | 1.12 (0.82-1.54) | 0.5207 |
| Readmission (within 30 days) | 1697 (21.82) | 952 (26.47) | **1.29 (1.18-1.41)** | **<0.0001** | 646 (20.07) | 808 (25.10) | **1.33 (1.18–1.50)** | **<0.0001** |
| In-hospital mortality | 21 (0.27) | 13 (0.36) | 1.34 (0.67-2.68) | 0.4601 | 12 (0.37) | 11 (0.34) | 0.92 (0.40-2.08) | 1 |
| Nasal Outcomes |  |  |  |  |  |  |  |  |
| New reduced/absent sense of smell/taste | 240 (3.09) | 127 (3.53) | 1.15 (0.92-1.43) | 0.2099 | 102 (3.17) | 121 (3.76) | 1.19 (0.91-1.56) | 0.2198 |
| Ophthalmic Outcomes |  |  |  |  |  |  |  |  |
| New visual acuity deterioration | 526 (6.76) | 291 (8.09) | **1.21 (1.05-1.41)** | **0.0124** | 218 (6.77) | 256 (7.95) | 1.19 (0.99-1.43) | 0.0773 |
| New visual fields deterioration | 1082 (13.91) | 535 (14.87) | 1.08 (0.97-1.21) | 0.1748 | 464 (14.41) | 484 (15.04) | 1.05 (0.92-1.21) | 0.504 |
| Endocrine Eutcomes |  |  |  |  |  |  |  |  |
| New hypopituitarism postoperatively | 856 (11.00) | 480 (13.34) | **1.25 (1.11-1.40)** | **0.0004** | 358 (11.12) | 428 (13.30) | **1.23 (1.06-1.42)** | **0.0086** |
| Postoperative dysnatraemia | 883 (11.35) | 475 (13.21) | **1.19 (1.05-1.34)** | **0.0051** | 374 (11.62) | 415 (12.89) | 1.13 (0.97-1.31) | 0.1284 |
| Sexual and reproductive health issues | 1143 (14.69) | 662 (18.40) | **1.31 (1.18-1.45)** | **<0.0001** | 575 (17.86) | 555 (17.24) | 0.96 (0.84-1.09) | 0.5336 |
| Recovery/improvement of pituitary function postoperatively | 2684 (34.50) | 1162 (32.30) | **0.91 (0.83-0.99)** | **0.0214** | 1039 (32.28) | 1008 (31.31) | 0.96 (0.86-1.06) | 0.422 |
| Disease Control |  |  |  |  |  |  |  |  |
| Reoperation (after 30 days) | 293 (3.77) | 152 (4.23) | 1.13 (0.92-1.38) | 0.2526 | 97 (3.01) | 118 (3.67) | 1.22 (0.93-1.61) | 0.1652 |

**Table 2. Comparison of Perioperative and Long-term Clinical Outcomes Between Smokers and Non-Smokers Before and After Propensity Score Matching.**
